# Supplementary material for: A Unique HMG-Box Domain of Mouse Maelstrom Binds Structured RNA but Not Double Stranded DNA
Source: PLoS One. 2015 Mar 25;10(3):e0120268. doi: 10.1371/journal.pone.0120268 (PMC4373776; doi:10.1371/journal.pone.0120268)
Supplement: S2 Table — (XLSX) [file pone.0120268.s007.xlsx]

## Sheet: Table S2
S2 Table. DNA substrate sequences
Length (nt)	Type	Sequence 5`-->3`	Substrate
117	Fw	AAATATAATACGACTCACTATAGGGCTACCTACTGCAGCCGGTTACCTTTTATATAAGACAGTCGTAAACAAAGTAGGGGTGATTGTTCAGCCCTATATGTGAGTCGTATTATATTT	dsDNA
117	Rew	AAATATAATACGACTCACATATAGGGCTGAACAATCACCCCTACTTTGTTTACGACTGTCTTATATAAAAGGTAACCGGCTGCAGTAGGTAGCCCTATAGTGAGTCGTATTATATTT
48	Fw	AACAAAGTAGGGGTGATTGTTCAGAACAAAGTAGGGGTGATTGTTCAG	dsDNA
48	Rew	CTGAACAATCACCCCTACTTTGTTCTGAACAATCACCCCTACTTTGTT
48	Fw	ATGAGGAACTTACCAGTTTTTCTTATCAATGAAACAATAACAAAGCGC	dsDNA
48	Rew	GCGCTTTGTTATTGTTTCATTGATAAGAAAAACTGGTAAGTTCCTCAT
40	Fw	GTGTAGTCGTGATAGGAAAAAAATGCAGGGGGTTATAGGG	dsDNA
40	Rew	CCCTATAACCCCCTGCATTTTTTTCCTATCACGACTACAC
26	Fw	AAAGGGTTAGGGTTAGGGTTAGGGAA	ssDNA
26	Rew	TTCCCTAACCCTAACCCTAACCCTTT
24	Fw	AACAAAGTAGGGGTGATTGTTCAG	dsDNA
24	Rew	CTGAACAATCACCCCTACTTTGTT
16	Fw	CAGTCGACGTCGTGAC	dsDNA
16	Rew	GTCACGACGTCGACTG
16	Fw	CAGTCGA[5me-dC]GTCGTGAC	methylated dsDNA
16	Rew	GTCACGA[5me-dC]GTCGACTG
15	Fw	GCGCAACAATGCCGG	dsDNA
15	Rew	CCGGCATTGTTGCGC
38	A	CCGACAGGACTGTCAACCAGGTAATATACCACTTGCGG	DNA 4WJ
35	B	CCGCAAGTGGTATATTACCTGGTACGCGTTCACGG
27	C	CCGTGAACGCGTGGTGCGAATCGG
24	D	CCGATTCGCACCTGACAGTCCTGTCGG
		Fw - forward
		Rew - reverse
		A-D - strands of 4WJ
